# Supplementary material
Source: PubMed Central journal article supplement (PMC5882031)
Supplement: Supplementary_Figure1.pdf [file Supplementary_Figure1.pdf]

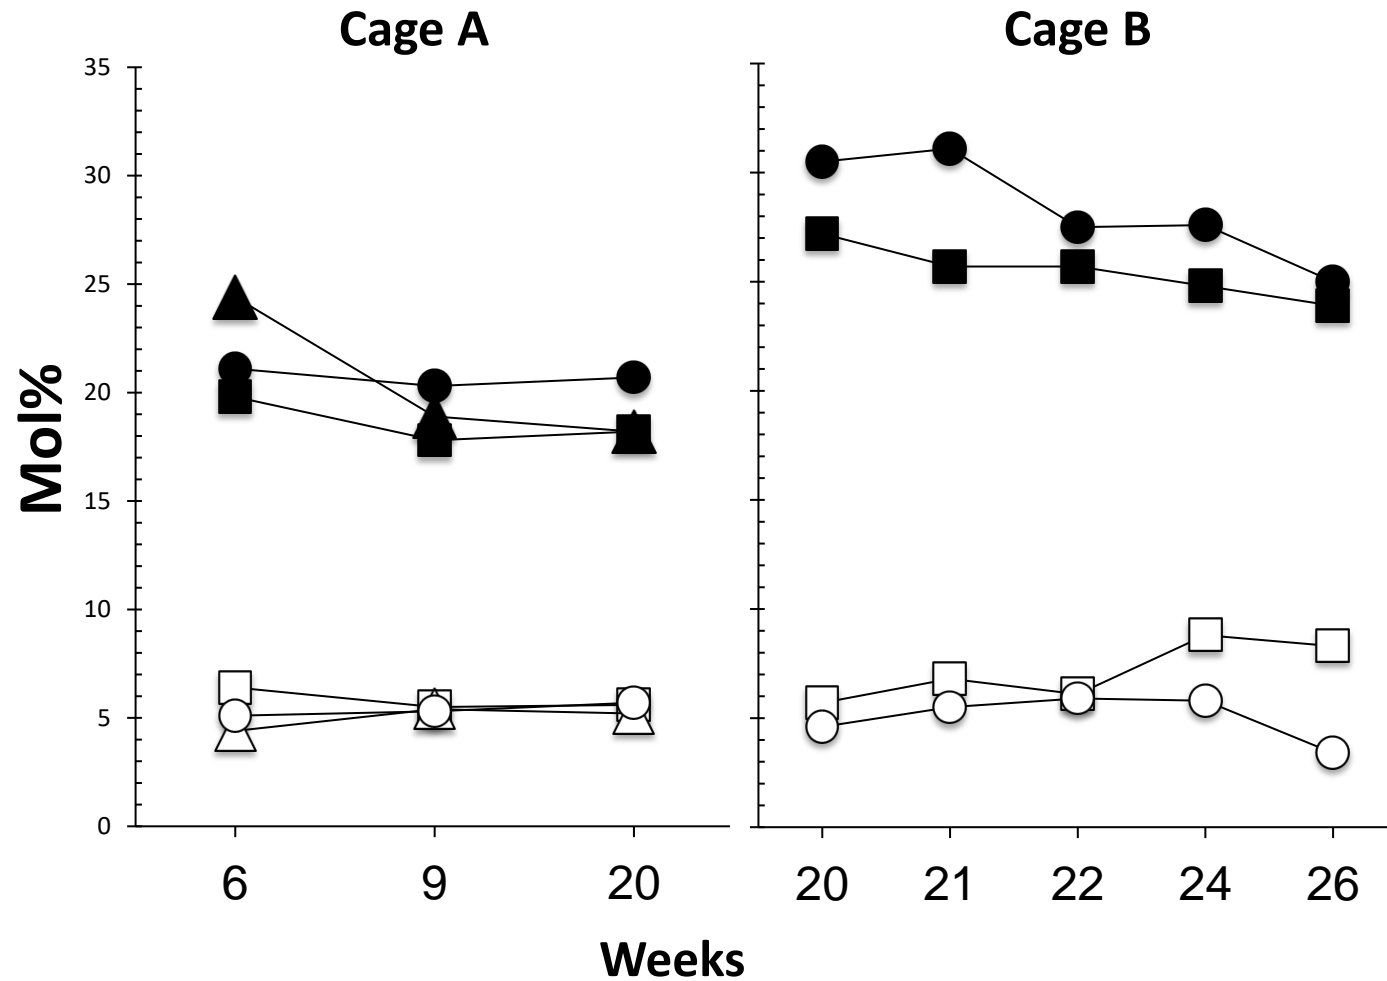

**Supplementary Figure 1.** Examples of pair-fed animals in two different cages, A and B. Plasma phospholipid concentration of linoleic acid (filled symbols) and docosahexaenoic acid (open symbols) in mice with genotypes *cftr* <sup>-/-</sup> (square), <sup>+/-</sup> (triangle) and wild type <sup>+/+</sup> (circle).
