# Supplementary material
Source: PubMed Central journal article supplement (PMC5882031)
Supplement: Supplementary_Table2.pdf [file Supplementary_Table2.pdf]

**Supplementary Table 2.** Examples of how to calculate the predicted concentration of linoleic acid (18:2n6) for a 30 days old wild type male<sup>a</sup> (with explanations) and a 15 days old heterozygote female mouse<sup>b</sup> (to the right) according to Laird NM &Ware JH, *Biometrics* 1982; **38**: 963-74.

| Linoleic acid (mol%)  |             | Example:            |                          |                     |                        |
|-----------------------|-------------|---------------------|--------------------------|---------------------|------------------------|
| Variable              | Coefficient | Mice 1 <sup>a</sup> |                          | Mice 2 <sup>b</sup> |                        |
| Age (log days)        | -0.80       | $\log_e(30)^c$      | $\log_e(30)^c * -0.80^d$ | $\log_e(15)$        | $\log_e(15)^c * -0.80$ |
| Sex                   |             |                     |                          |                     |                        |
| Female (ref.)         | 0           | No                  |                          |                     |                        |
| Male                  | -3.52       | Yes                 | -3.52                    | No                  |                        |
| Age (log days)*Male   | 1.42        |                     | $1.42 * \log_e(30)$      |                     |                        |
| Allele                |             |                     |                          |                     |                        |
| +/+                   | 0 (ref.)    | Yes                 |                          |                     |                        |
| +/-                   | -1.49       | No                  |                          | Yes                 | -1.49                  |
| -/-                   | -2.94       | No                  |                          | No                  |                        |
| Intercept             | 24.97       |                     | 24.97                    |                     | 24.97                  |
| Predicted value (sum) |             |                     | 23.56 <sup>#</sup>       |                     | 21.31                  |

<sup>c</sup> The age of the mouse in  $\log_e$  (days); <sup>d</sup> Coefficient multiplied with value of age; <sup>#</sup> The sum of all values in this column gives the concentration of 18:2n6 for the mouse that day.
