# Supplementary material
Source: PubMed Central journal article supplement (PMC5882031)
Supplement: Supplementary_Table3.pdf [file Supplementary_Table3.pdf]

**Supplementary table 3.** Median (IQR) of the first measurement in every animal of plasma phospholipid fatty acid concentrations in wild type mice (+/+), heterozygotes (+/-) and homozygotes (-/-) for CF mutation. Statistical analyses were done with Kruskal-Wallis test.

| Fatty acid                       | Genotype             |                      |                      | p-value |
|----------------------------------|----------------------|----------------------|----------------------|---------|
|                                  | +/+                  | +/-                  | -/-                  |         |
| n                                | 15                   | 13                   | 22                   |         |
| Lauric acid 12:0                 | 0.70 (0.60, 0.80)    | 0.80 (0.60, 0.80)    | 0.80 (0.50, 1.00)    | 0.92    |
| Myristic acid 14:0               | 1.80 (1.50, 2.20)    | 1.60 (1.40, 2.00)    | 2.30 (2.00, 2.50)    | 0.14    |
| Myristoleic acid 14:1            | 0.10 (0.10, 0.10)    | 0.10 (0.10, 0.10)    | 0.10 (0.10, 0.10)    | 0.98    |
| Palmitic acid 16:0               | 29.60 (28.20, 31.30) | 26.80 (25.40, 29.30) | 27.80 (26.70, 29.20) | 0.12    |
| Palmitoleic acid 16:1            | 0.70 (0.60, 0.80)    | 0.80 (0.50, 0.90)    | 0.80 (0.60, 0.80)    | 0.79    |
| Stearic acid 18:0                | 16.10 (14.50, 17.90) | 16.20 (15.60, 16.80) | 18.60 (17.70, 18.90) | 0.007   |
| Oleic acid 18:1                  | 12.50 (11.90, 13.70) | 15.60 (15.40, 16.30) | 14.25 (13.10, 15.70) | 0.002   |
| Linoleic acid 18:2n6,            | 22.70 (19.10, 24.60) | 20.90 (20.00, 21.50) | 18.90 (17.90, 20.20) | 0.008   |
| Arachidic acid 20:0              | 0.35 (0.30, 0.40)    | 0.30 (0.30, 0.40)    | 0.30 (0.30, 0.30)    | 0.062   |
| $\alpha$ -linolenic acid 18:3n3, | 0.60 (0.60, 0.60)    | 0.60 (0.50, 0.60)    | 0.50 (0.50, 0.60)    | 0.43    |
| Eicosadienoic acid               |                      |                      |                      |         |
| 20:2n6                           | 0.30 (0.20, 0.30)    | 0.30 (0.30, 0.40)    | 0.20 (0.20, 0.30)    | 0.018   |
| Dihomo- $\gamma$ -linolenic      |                      |                      |                      |         |
| acid 20:3n6                      | 0.01 (0.01, 0.01)    | 0.01 (0.01, 0.10)    | 0.01 (0.01, 0.01)    | 0.17    |
| Behenic acid 22:0                | 0.40 (0.40, 0.40)    | 0.30 (0.30, 0.50)    | 0.40 (0.30, 0.40)    | 0.31    |
| Arachidonic acid                 |                      |                      |                      |         |
| 20:4n6                           | 6.50 (3.10, 7.30)    | 7.50 (3.20, 8.70)    | 7.80 (3.60, 8.70)    | 0.67    |
| Lignoceric acid 24:0             | 0.30 (0.20, 0.50)    | 0.20 (0.20, 0.30)    | 0.35 (0.20, 0.40)    | 0.26    |
| Nervonic acid 24:1               | 0.70 (0.70, 0.80)    | 0.70 (0.50, 1.40)    | 0.70 (0.60, 1.10)    | 0.82    |
| Docosahexaenoic acid             |                      |                      |                      |         |
| 22:6n3                           | 5.40 (5.10, 6.20)    | 5.00 (4.60, 6.30)    | 5.70 (4.70, 6.70)    | 0.35    |
